# Supplementary material for: Highly dispersed Fe–Ce mixed oxide catalysts confined in mesochannels toward low-temperature oxidation of formaldehyde
Source: Royal Society of Chemistry journal article supplement (doi:10.1039/d0ta05473a), 2020-01-01
Supplement: d0ta05473a1.pdf [file d0ta05473a1.pdf]

## Supporting Information

### Highly dispersed Fe-Ce Mixed Oxide Catalysts Confined in Mesochannels toward Low-Temperature Oxidation Formaldehyde

*Jianwei Fan<sup>a</sup>, Xufei Niu<sup>a</sup>, Wei Teng<sup>a\*</sup>, Peng Zhang<sup>a</sup>, Wei-xian Zhang<sup>a</sup>, Dongyuan Zhao<sup>b</sup>*

<sup>a</sup> State Key Laboratory for Pollution Control, School of Environmental Science and Engineering, Shanghai Institute of Pollution Control and Ecological Security, Tongji University, Shanghai 200092, P. R. China

<sup>b</sup> Department of Chemistry, State Key Laboratory of Molecular Engineering of Polymers, Shanghai Key Lab of Molecular Catalysis and Innovative Materials, Laboratory of Advanced Materials, iChEM, Fudan University, Shanghai 200092, P. R. China

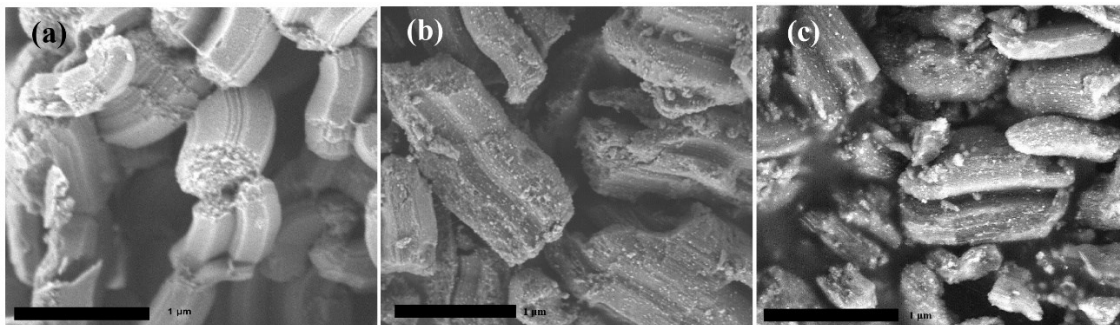

**Fig. S1** SEM images of SBA-15 supported  $\text{FeO}_x\text{-CeO}_x$  catalysts with different contents and calcination temperatures: 10% $\text{FeO}_x\text{-CeO}_x\text{/SBA-15-350}$  (a), 30% $\text{FeO}_x\text{-CeO}_x\text{/SBA-15-350}$  (b) and 20% $\text{FeO}_x\text{-CeO}_x\text{/SBA-15-550}$  (c).

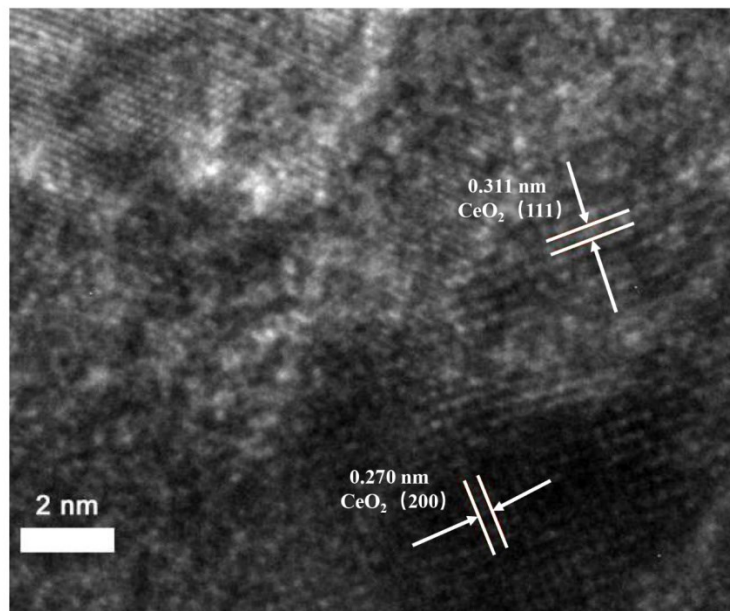

**Fig. S2** HRTEM image of the 20%FeO<sub>x</sub>-CeO<sub>x</sub>/SBA-15-350 catalyst.

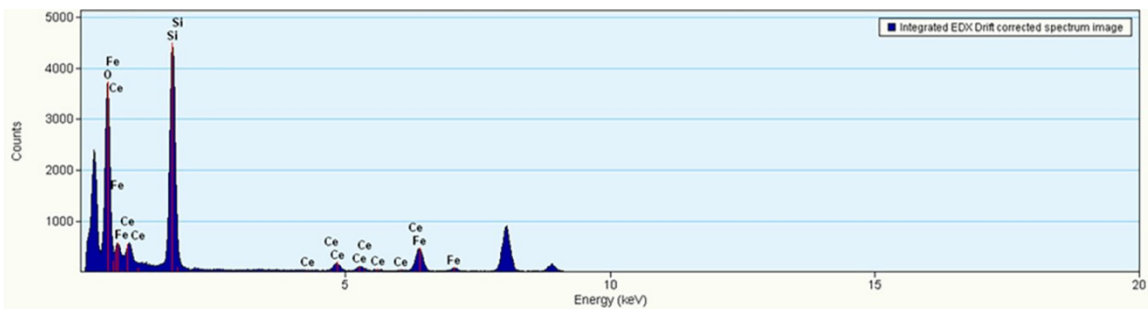

**Fig. S3** EDS spectrum of the 20%FeO<sub>x</sub>-CeO<sub>x</sub>/SBA-15-350 catalyst.

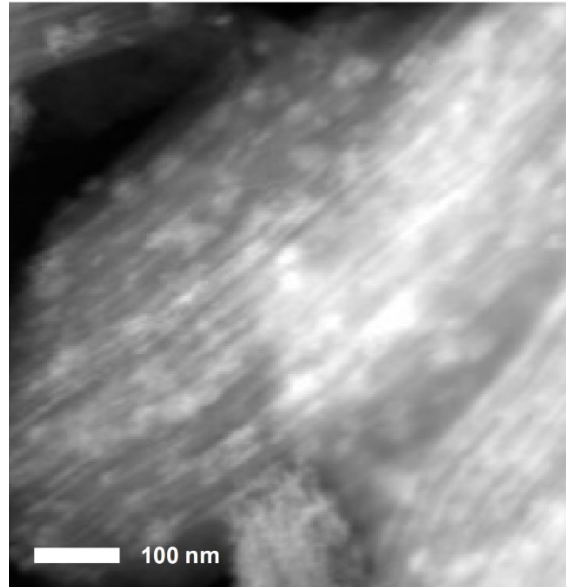

**Fig. S4** HAADF-STEM image of 30% FeO<sub>x</sub>-CeO<sub>x</sub>/SBA-15-350.

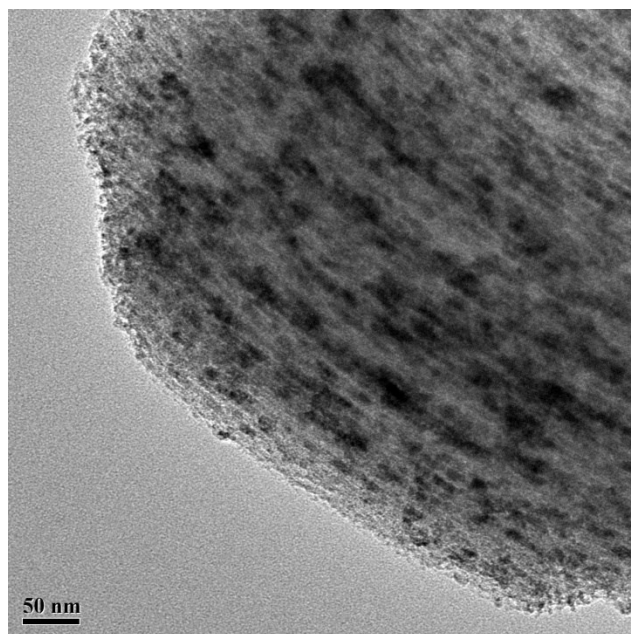

**Fig. S5** TEM image of the 20%FeO<sub>x</sub>-CeO<sub>x</sub>/SBA-15-350-one pot catalyst prepared by one-pot method with the addition of Fe and Ce precursors at the same time.

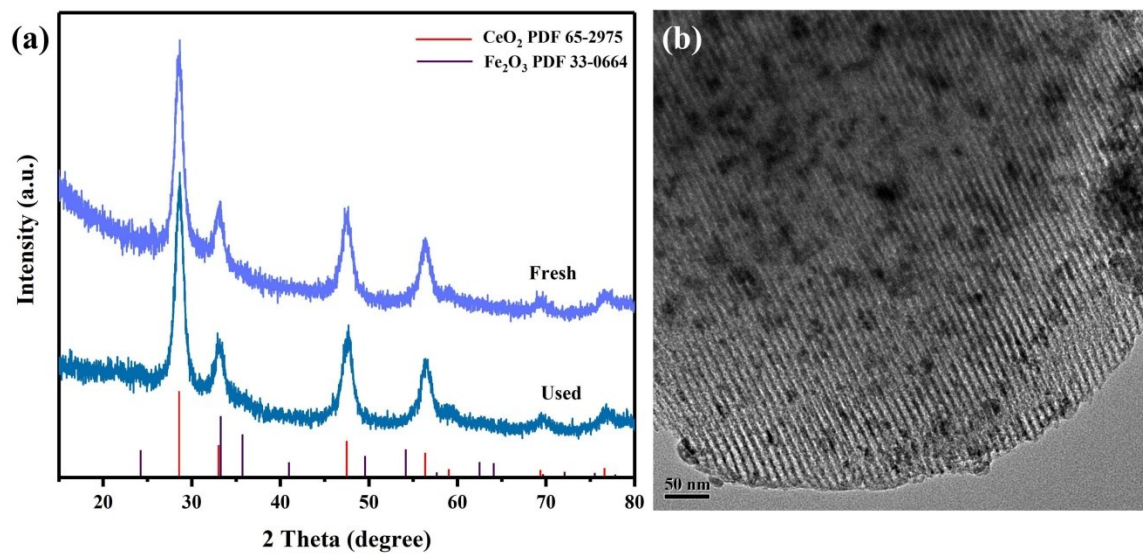

**Fig. S6** XRD patterns and TEM image of the used 20%FeO<sub>x</sub>-CeO<sub>x</sub>/SBA-15-350 catalyst.

**Table S1** The ratio of Ce<sup>3+</sup> and Ce<sup>4+</sup> of the catalysts based on XPS results.

| Catalyst                                           | Ce <sup>3+</sup> /<br>(Ce <sup>3+</sup> +Ce <sup>4+</sup> ) |
|----------------------------------------------------|-------------------------------------------------------------|
| CeO <sub>2</sub> /SBA-15-350                       | 6.30%                                                       |
| 10% FeO <sub>x</sub> -CeO <sub>x</sub> /SBA-15-350 | 13.91%                                                      |
| 20% FeO <sub>x</sub> -CeO <sub>x</sub> /SBA-15-350 | 18.02%                                                      |
| 30% FeO <sub>x</sub> -CeO <sub>x</sub> /SBA-15-350 | 15.60%                                                      |
| 20% FeO <sub>x</sub> -CeO <sub>x</sub> /SBA-15-550 | 12.12%                                                      |



**Table S2** Comparison of HCHO catalytic oxidation performance of FeO<sub>x</sub>-CeO<sub>x</sub>/SBA-15 with other catalysts reported in relevant literature.

| Catalyst                                | HCHO concentration     | Conversion | T (°C) | Ref.      |
|-----------------------------------------|------------------------|------------|--------|-----------|
| FeO <sub>x</sub> -CeO <sub>x</sub> /SBA | 9.8 µg/L               | 65%        | 30     | This work |
|                                         |                        | 94.9%      | 60     | This work |
| Au-Pd/CeO <sub>2</sub>                  | 8 ppm                  | 50%        | 30     | [1]       |
|                                         |                        | 86%        | 40     |           |
| Au/FeO <sub>x</sub>                     | 6.25 mg/m <sup>3</sup> | 20%        | 20     | [2]       |
|                                         |                        | 52%        | 40     |           |
| Au/CeO <sub>2</sub> (3DOM)              | 8 ppm                  | 32%        | 20     | [3]       |
|                                         |                        | 70%        | 40     |           |
| OMS-2/SiO <sub>2</sub>                  | 15 ppm                 | 52.3       | 25     | [4]       |
| NH <sub>2</sub> -Pt/TiO <sub>2</sub>    | 10 ppm                 | 26%        | 30     | [5]       |

**Table S3** IR bands of the adsorption of HCHO on the 20% FeO<sub>x</sub>-CeO<sub>x</sub>/SBA-15-350 catalyst.

| IR band wavenumber (cm <sup>-1</sup> ) |                              |                             |                     |                               |                              |                       |                  |                    |
|----------------------------------------|------------------------------|-----------------------------|---------------------|-------------------------------|------------------------------|-----------------------|------------------|--------------------|
| -OH                                    | C-H                          |                             |                     | HCOO-                         |                              | DOM                   |                  | Carbonates         |
| $\nu(\text{OH})$                       | $\nu_{\text{as}}(\text{CH})$ | $\nu_{\text{s}}(\text{CH})$ | $\delta(\text{CH})$ | $\nu_{\text{as}}(\text{OCO})$ | $\nu_{\text{s}}(\text{OCO})$ | $\delta(\text{CH}_2)$ | $\nu(\text{CO})$ | $\nu(\text{CO}_3)$ |
| ~3743                                  | ~2889                        | ~2937                       | ~2969               | ~1600                         | ~1510                        | ~1469                 | ~1128            | ~1390              |
| ~3413                                  |                              |                             |                     |                               |                              |                       |                  | ~1310              |

## Supporting References

- 1 Q. Wang, W. Jia, B. Liu, W. Zhao, C. Li, J. Zhang and G. Xu, *Chem. Asian J.*, 2012, **7**, 2258-2267.
- 2 C. Li, Y. Shen, M. Jia, S. Sheng, M. O. Adebajo and H. Zhu, *Catal. Commun.*, 2008, **9**, 355-361.
- 3 J. Zhang, Y. Jin, C. Li, Y. Shen, L. Han, Z. Hu, X. Di and Z. Liu, *Appl. Catal., B*, 2009, **91**, 11-20.
- 4 J. Su, C. Cheng, Y. Guo, H. Xu and Q. Ke, *J. Hazard. Mater.*, 2019, **380**, 120890.
- 5 B. Liu, C. Hsieh, W. Wang, C. Huang and C. Huang, *Chem. Eng. J.*, 2013, **232**, 434-441.
